# Supplementary material for: Aptamer-regulated colorimetric and electrochemical dual-mode sensor for the detection of uranyl ions utilizing AuNCs@COF composite
Source: Research Square preprint supplement (doi:10.21203/rs.3.rs-5971480/v1), 2025-02-10
Supplement: Supplementary file 2 [file 7f84ed68676872f8e8d1dda1.docx]

**Aptamer-regulated colorimetric and electrochemical dual-mode sensor for the detection of uranyl ions utilizing AuNCs@COF composite**

Zhijun Chen a,b, Jinquan Liu a,b,d*, Wenyu Wang a,b, Guoqing Qin a,b, Siru Liu a,b, Weilin Zhang a,b, Changmin Peng a,b, Yan Tan a,b, Zhongran Dai c, Deshuai Zhen a,b, Le Li a,b*

a Department of Health Inspection and Quarantine, School of Public Health, Hengyang Medical School, University of South China, Hengyang, 421001, China.

b Hunan Province Key Laboratory of Typical Environment Pollution and Health Hazards, University of South China, Hengyang, 421001, China.

c Key Discipline Laboratory for National Defense for Biotechnology in Uranium Mining and Hydrometallurgy, University of South China, Hengyang, 421001, China.

d State Environmental Protection Key Laboratory of Monitoring for Heavy Metal Pollutants.

* Corresponding Author: Le Li and Jinquan Liu; E-mail addresses: usclile@126.com (Le Li) and letliufly@163.com (Jinquan Liu).

**Reagents and apparatus**

Glacial acetic acid (HAc), acetonitrile (ACN), benzaldehyde, sodium hydroxide (NaOH), 1,3,5-Tris(4-aminophenyl)benzene (TPB), 2,5-dimethoxyterephthalaldehyde (DMTP), Polyvinylpyrrolidone (PVP, Mw=8000), potassium ferricyanide (K3Fe(CN)6), potassium ferrocyanide (K4Fe(CN)6·3H2O), potassium chloride (KCl) and Tetrachloroauric (III) acid trihydrate (HAuCl4·3H2O) were all purchased from Aladdin Reagent Co., Ltd. 3,3′,5,5′-tetramethylbenzidine (TMB), 6-aza-2-thiothymine (ATT), L-Tryptophan (Trp), isopropyl alcohol (IPA) and p-benzoquinone (PBQ) were bought from Shanghai Macklin Biochemical Co., Ltd. 30% hydrogen peroxide (H2O2), hydrochloric acid (HCl) and sodium acetate (NaAc) were sourced from Chengdu Jinshan Chemical Reagent Co., Ltd, Hunan hengyang kaixin chemical Co., Ltd and Xilong Chemical Reagent Co., Ltd, respectively. Uranyl nitrate hexahydrate (UO2NO3·6H2O) was obtained from Search Banner Reagent Co. Ltd (Shanghai, China). Anhydrous ethanol (CH3CH2OH) was provided by Tianjin Tianqi Chemical Reagent Co. Ltd. The UO22+ aptamer (5'-CAC GTC CAT CTC TGC AGT CGG GTA GTT AAA CCG ACC TTC AGA CAT AGT GAG T-3') was offered by Sengon Biotech Co., Ltd [1]. All reagents used in this investigation were analytically pure and used directly without further purification. Aqueous solutions were prepared by using ultrapure water (>18 MΩ·cm).

The scanning electron microscopy (SEM) images were conducted on a ZEISS Sigma 300 (Germany). Transmission electron microscopy (TEM) images, high-resolution TEM (HRTEM) images and elemental mapping were performed on a JEM-F200 instrument (Japan). The fourier transform infrared (FT-IR) spectra and the X-ray diffraction (XRD) patterns were provided by a Thermo Nicolet IS5 instrument (USA) and a Bruker D8 Advance X-ray diffractometer (Germany), respectively. A Thermo Scientific K-Alpha X-ray photoelectron spectrometer (USA) was adopted to offer the X-ray photoelectron spectroscopy (XPS) spectra. Moreover, Brunauer-Emmett-Teller (BET) specific surface areas of materials were obtained using a Micromeritics ASAP 2460 instrument (USA). The ultraviolet-visible (UV-Vis) absorption spectra were gained by a Shimadzu UV-2550A UV-visible spectrophotometer (Shanghai, China). Electron paramagnetic resonance (EPR) experiments were measured on a Bruker A300 spectrometer (Germany). The differential pulse voltammetry (DPV) and cyclic voltammetry (CV) were operated on a CHI852C electrochemical workstation from Shanghai Chen Hua Instrument (Shanghai, China). Furthermore, electrochemical impedance spectroscopy (EIS) was executed on a CS350H electrochemical workstation of Wuhan KST Instruments (Wuhan, China). The pH measurement was done using an S2-Field Kit pH meter (Mettler-Toledo, Switzerland).


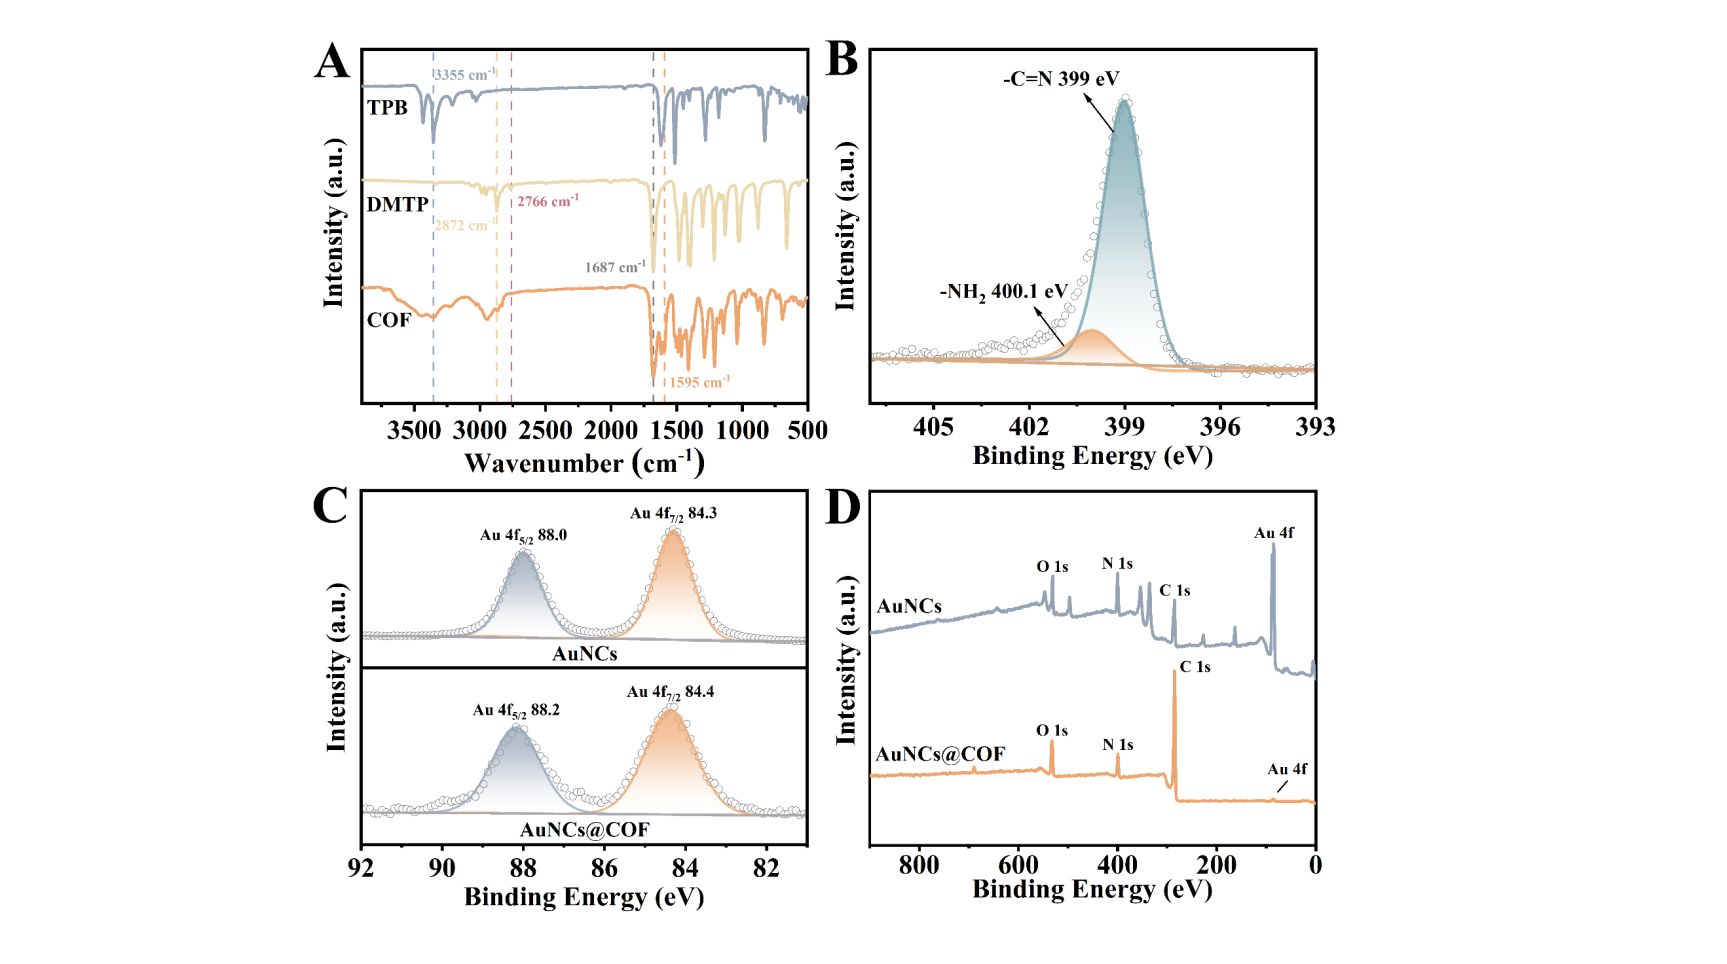


**Figure S1.** (A) FT-IR spectra of TPB, DMTP and COF. (B) Narrow scan spectra of N 1s of AuNCs@COF, and (C) Au 4f of AuNCs and AuNCs@COF. (D) XPS spectra of AuNCs and AuNCs@COF.


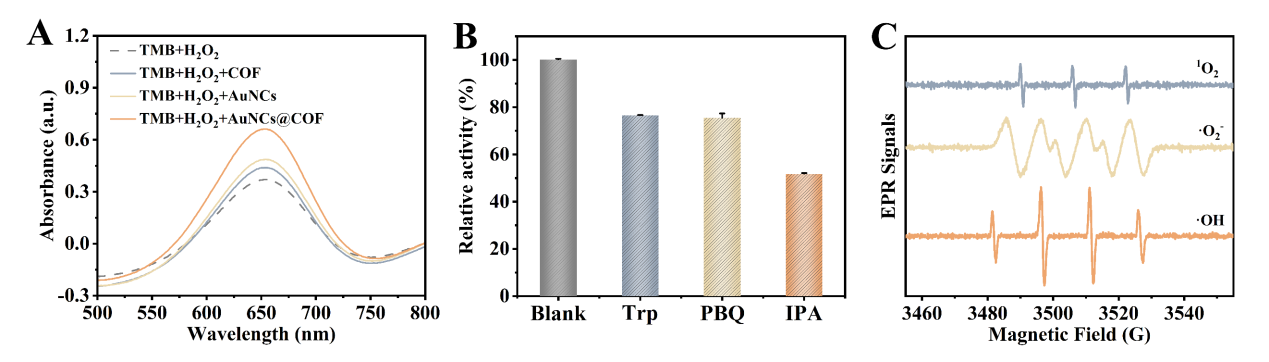


**Figure S2.** (A) UV vis absorption spectra of COF, AuNCs and AuNCs@COF in TMB, H2O2 and NaAc-Hac (pH=4.0) system. (B) Radical scavengers on the catalytic activity of AuNCs@COF. (C) EPR signals of 1O2, •O2- and •OH in the presence of AuNCs@COF.


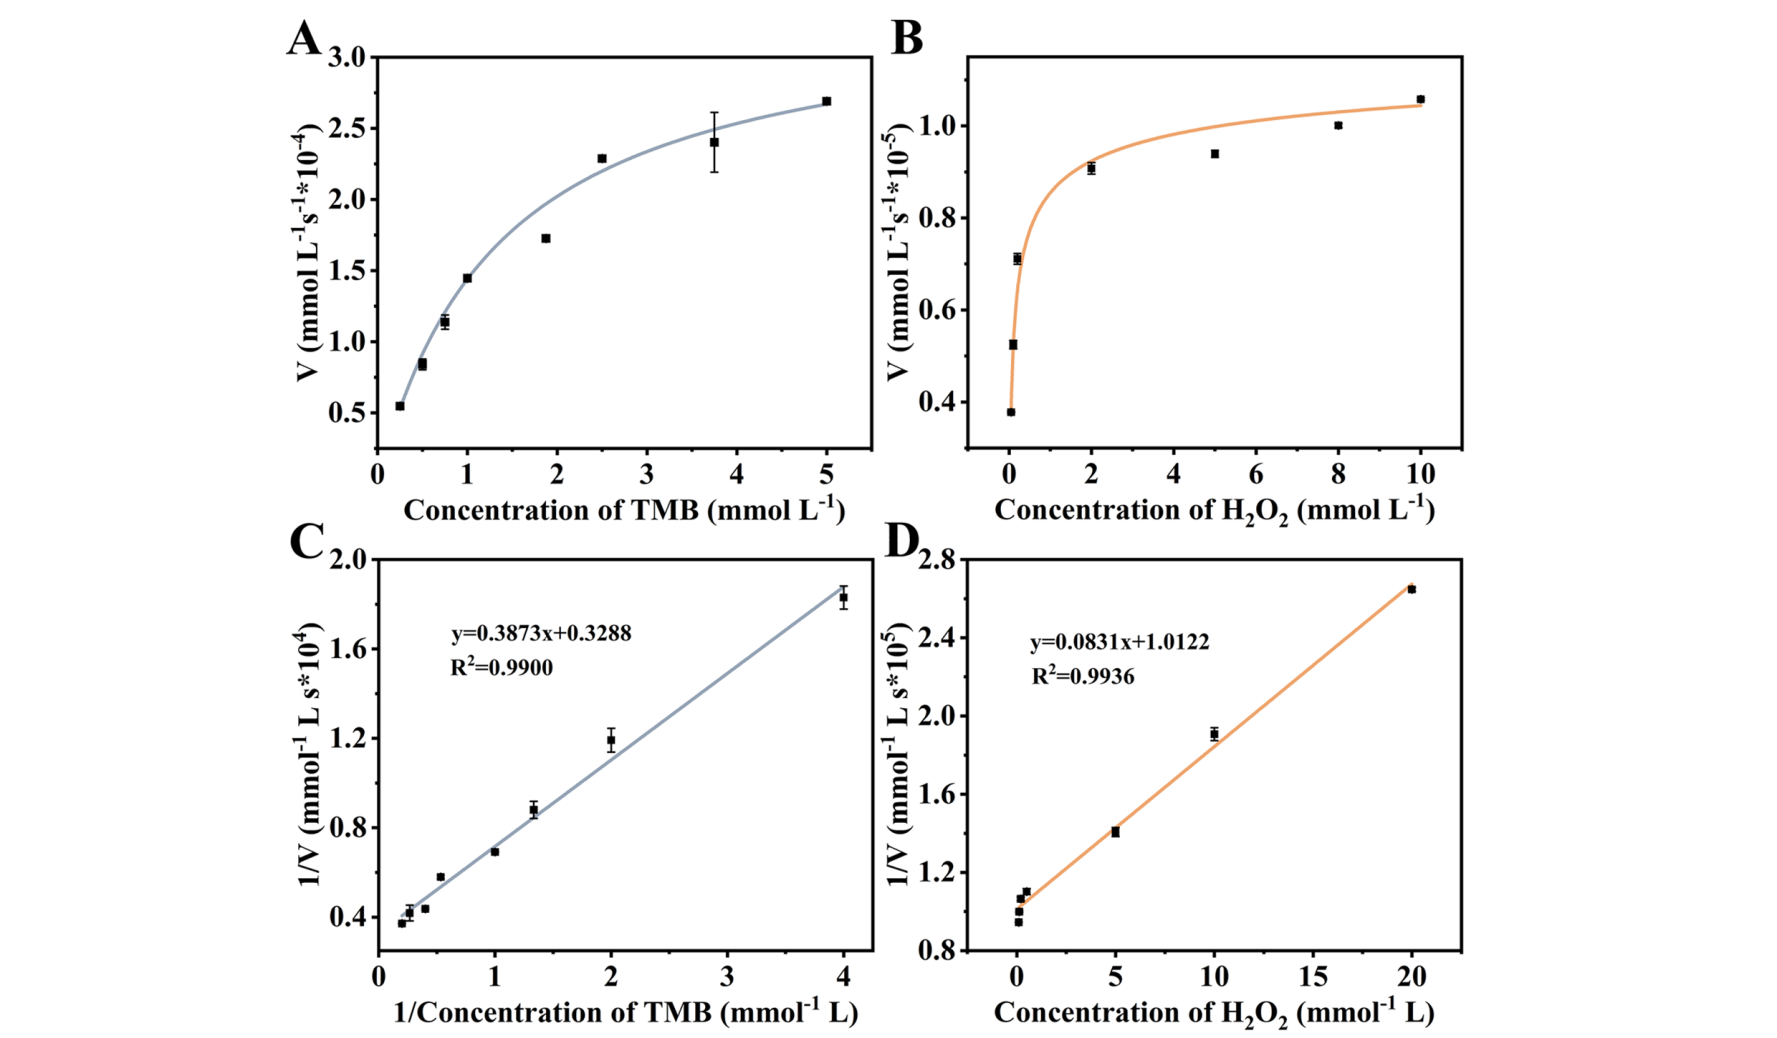


**Figure S3.** The results of Michaelis-Menten equation nonlinear fitting on the experimental data from (A) TMB and (B) H2O2. The typical Lineweaver-Burk double reciprocal plots of (C) TMB and (D) H2O2.

**Optimization of experimental conditions**

To acquire the better analytical performance, the influence of the main testing parameters including the concentration of aptamer, the incubation time of aptamer, the binding time of UO22+, the pH value of detection solution and TMB reaction time were successively optimized.

The concentration of aptamer was first observed. As shown in Fig. S4A, the absorbance increased significantly as the aptamer concentration rose from 1 μmol/L to 5 μmol/L, plateauing beyond 5 μmol/L. This saturation effect was attributed to the near-complete binding of the aptamer to AuNCs@COF. Similarly, in the electrochemical mode (Fig. S5A), the electrochemical signal response gradually weakened with increasing aptamer concentration from 2 μmol/L to 5 μmol/L, after which it remained nearly constant. Therefore, 5 μmol/L was selected as the optimal concentration for dual-mode detection.

As shown in Fig. S4B, the absorbance increased with longer incubation times of the aptamer with the materials, eventually stabilizing. Therefore, 60 minutes was selected as the optimal incubation time for aptamer-AuNCs@COF in the colorimetric mode. Similarly, in the electrochemical mode, the DPV current decreased as the incubation time of Apt with the electrode increased but remained stable beyond 20 minutes. Accordingly, 20 minutes was determined to be the optimal incubation time for aptamer-AuNCs@COF/SPCE in the electrochemical mode (Fig. S5B).

As presented in Fig. S4C and S5C, the binding time of UO22+ with the aptamer significantly influenced the dual-mode detection. In the colorimetric assay, the absorbance decreased as the binding time increased from 10 minutes to 60 minutes, with little change observed beyond 60 minutes. Similarly, in electrochemical detection, the current value gradually increased as the binding time extended, stabilizing after 60 minutes. This trend was attributed to the higher degree of aptamer separation from the material or electrode with longer binding times. Consequently, 60 minutes was selected as the optimal binding time for both detection modes.

As shown in Fig. S4D, the absorbance increased with rising pH of detection solution within the range of 3.0 to 4.0 and gradually declined at pH levels exceeding 4.0. Thus, pH 4.0 was determined to be the optimal condition for the colorimetric assay. Similarly, as illustrated in Fig. S5D, the trend of the current difference with and without UO22+ in the electrochemical detection mode exhibited a similar pattern, also indicating pH 4.0 as the optimal condition.

Additionally, as shown in Fig. S4E, the absorbance initially increased with the TMB reaction time and then declined, reaching its peak at 20 minutes. This finding suggested that 20 minutes was the optimal color development time for the colorimetric sensor.


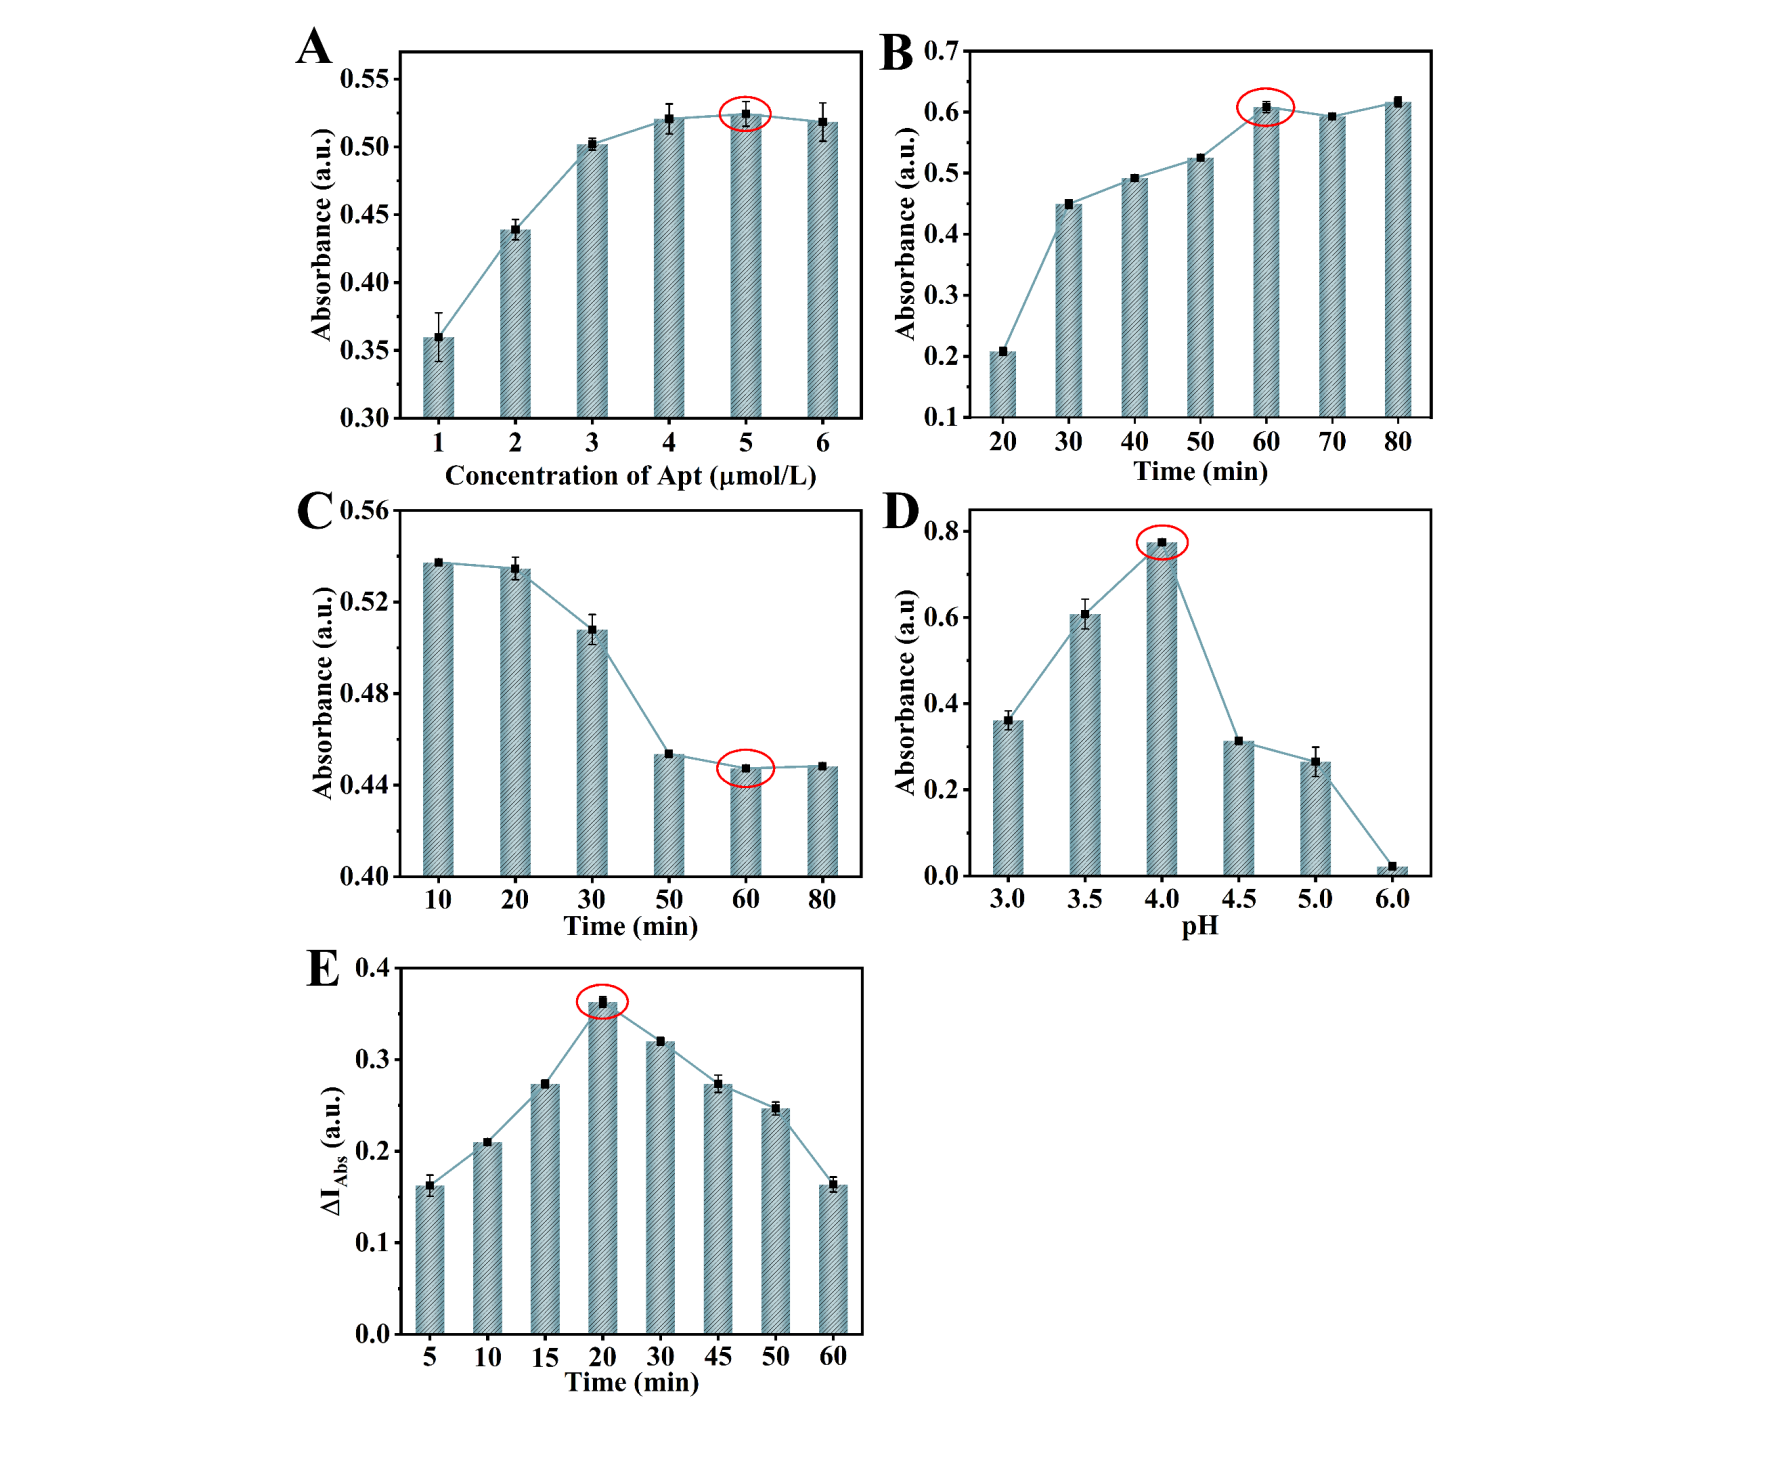


**Figure S4.** Optimization of the colorimetric experimental conditions. (A) Effect of the concentration of aptamer; (B) the incubation time of Apt/AuNCs@COF biological probe; (C) the binding time of UO22+ with aptamer; (D) the pH value of detection solution; (E) the TMB reaction time.


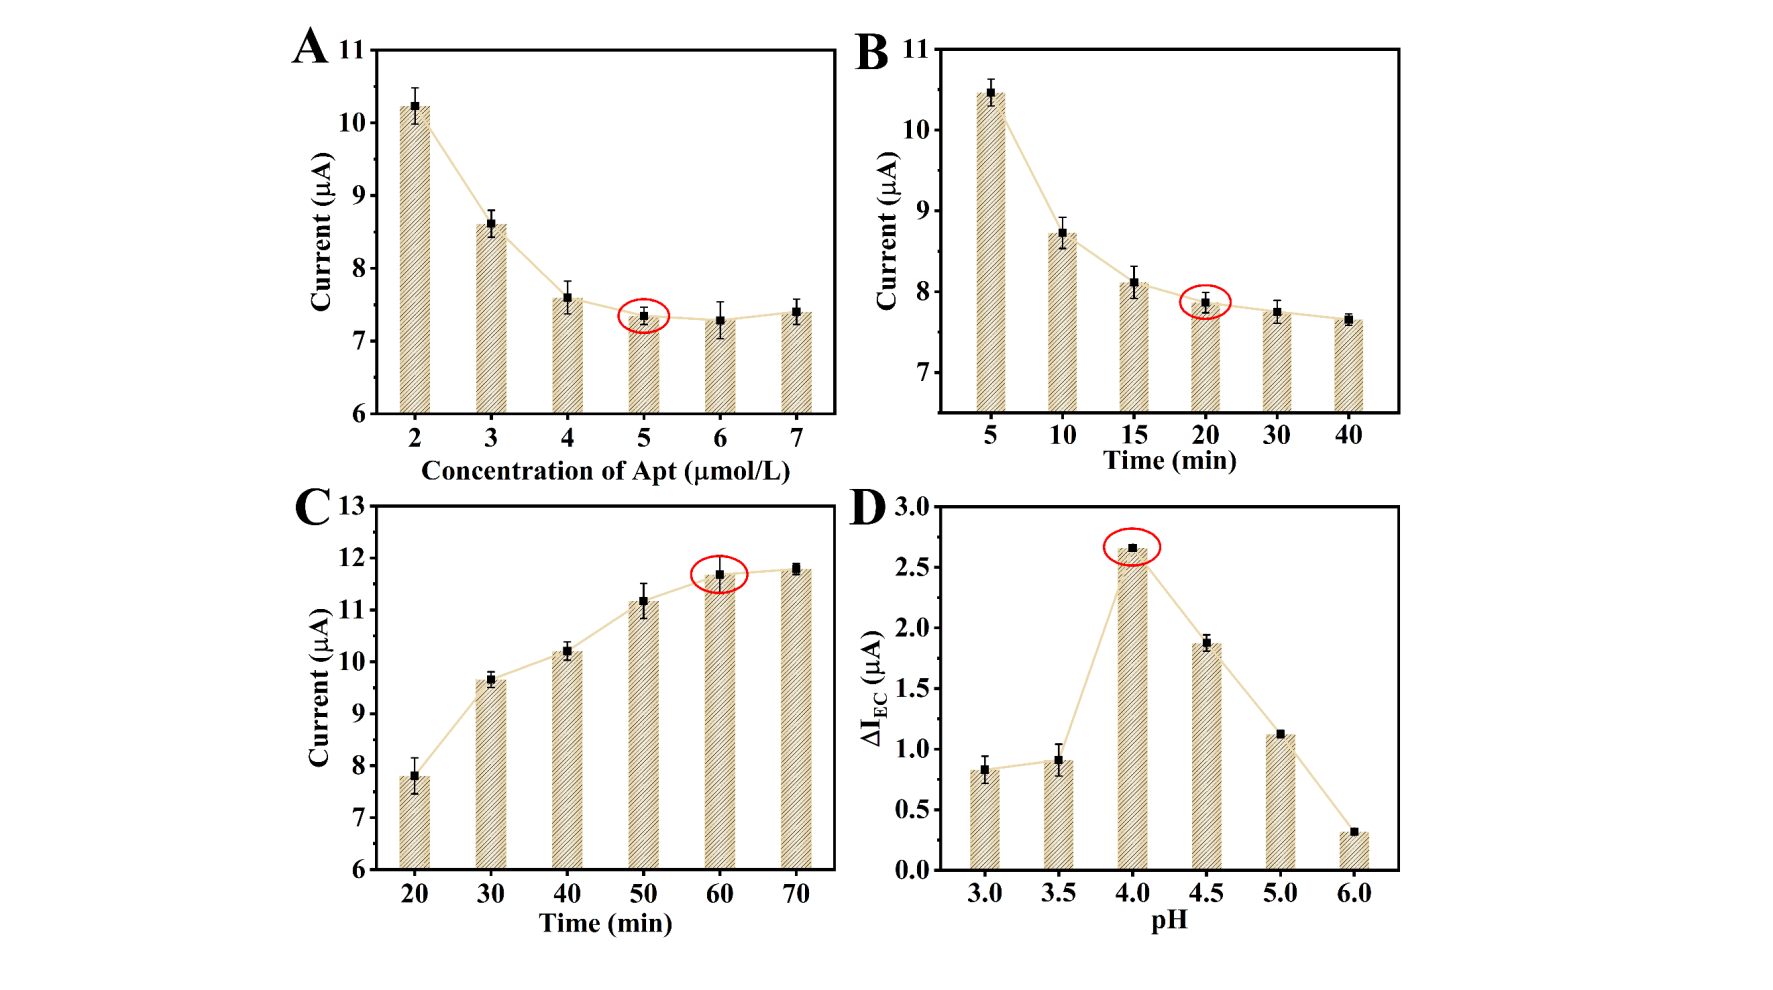


**Figure S5.** Optimization of the electrochemical experimental conditions. (A) Effect of the concentration of aptamer; (B) the incubation time of Apt/AuNCs@COF biological probe; (C) the binding time of UO22+ with aptamer; (D) the pH value of detection solution.

**Table S1** Comparison of the kinetic parameters of AuNCs@COF and other reported nanozymes.

| **Catalysts** | ***Km*(mmol L-1)** | | ***Vmax*(mmol L-1 s-1)** | | **Reference** |
| --- | --- | --- | --- | --- | --- |
| **TMB** | **H2O2** | **TMB** | **H2O2** |
| 1-Me-D-Trp@AuNCs | 1.51 | 6.3×10-3 | 1.91×10-8 | 0.46×10-8 | [2] |
| CaF2 | 1.01 | 323 | 2.70×10-4 | 2.30×10-4 | [3] |
| Fe-MOF-GOx | 2.60 | 1.30 | 5.60×10-5 | 2.50×10-5 | [4] |
| Fe-COF-H3 | - | 1.11 | - | 4.53×10-5 | [5] |
| HRP | 0.415 | 5.2 | 3.25×10-6 | 8.03×10-6 | [6] |
| AuNCs@COF | 1.18 | 0.0821 | 30.4×10-5 | 0.988×10-5 | This work |

**
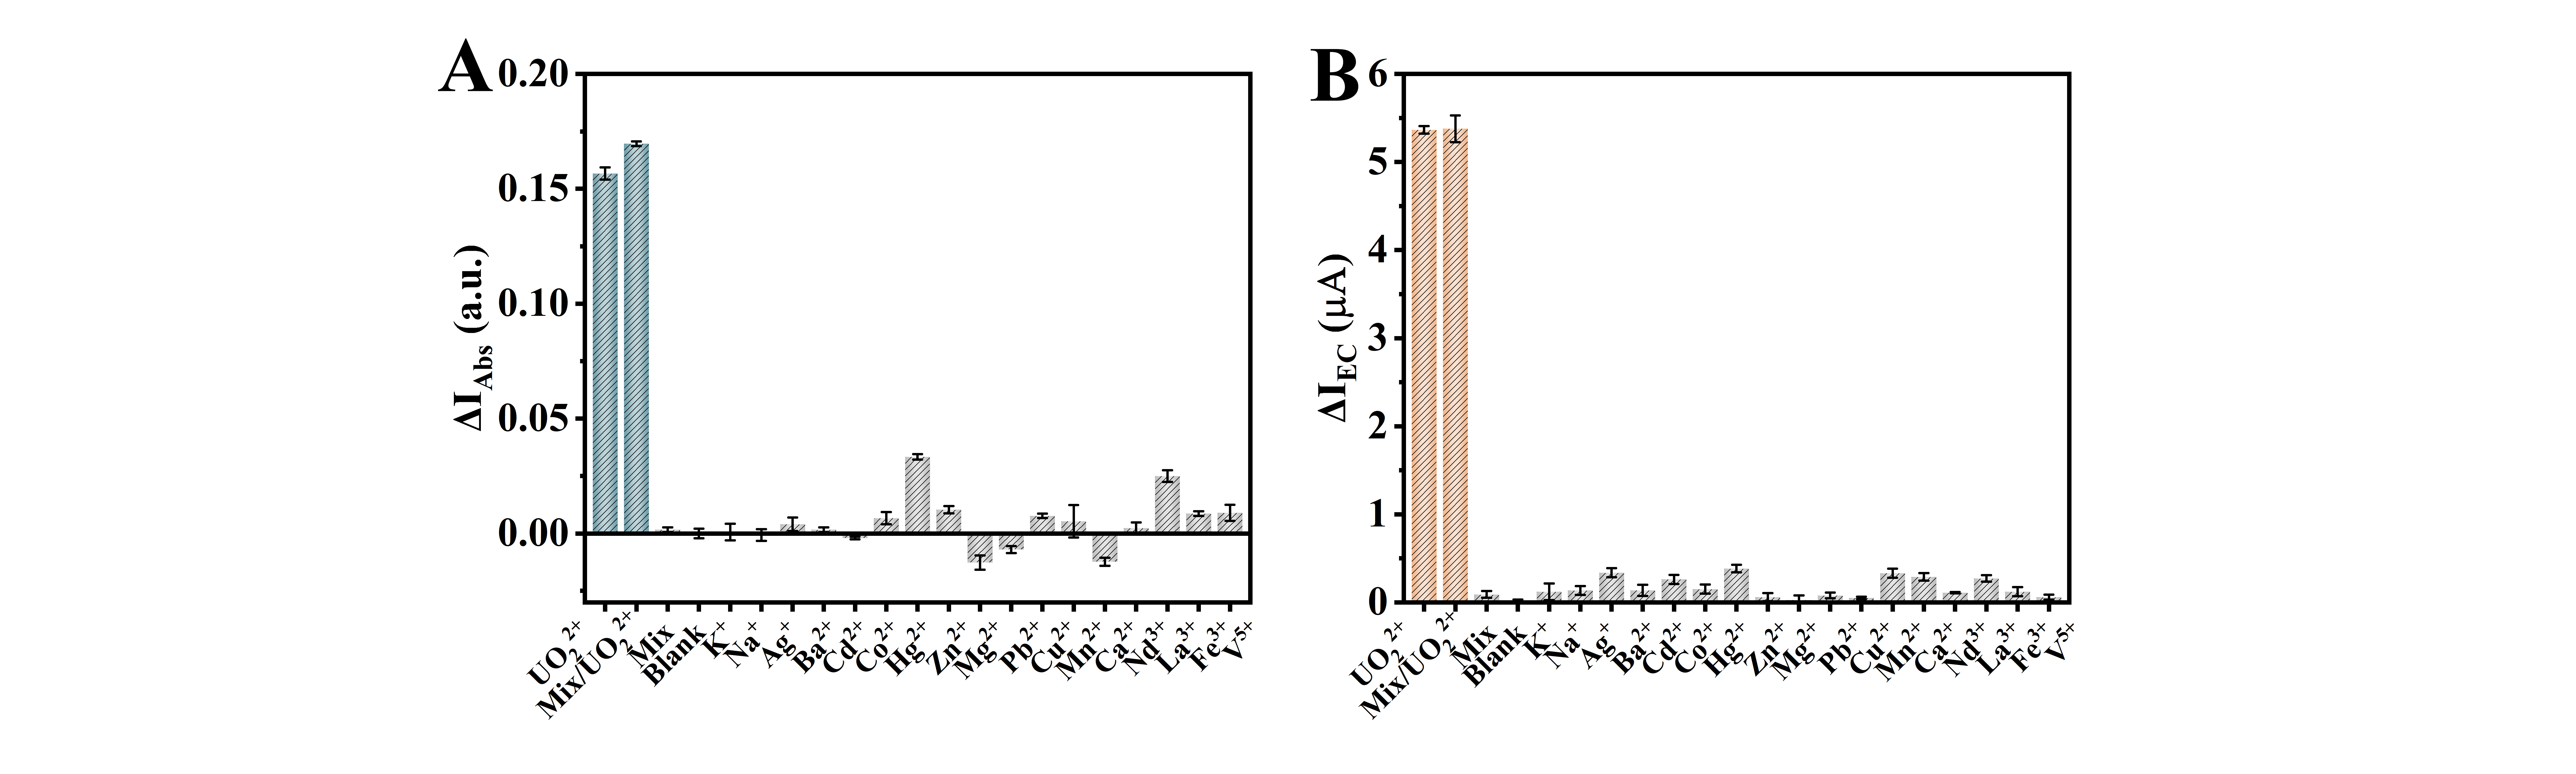
**

**Figure S6.** Selectivity of (A) the colorimetric biosensor and (B) the electrochemical biosensor.

**
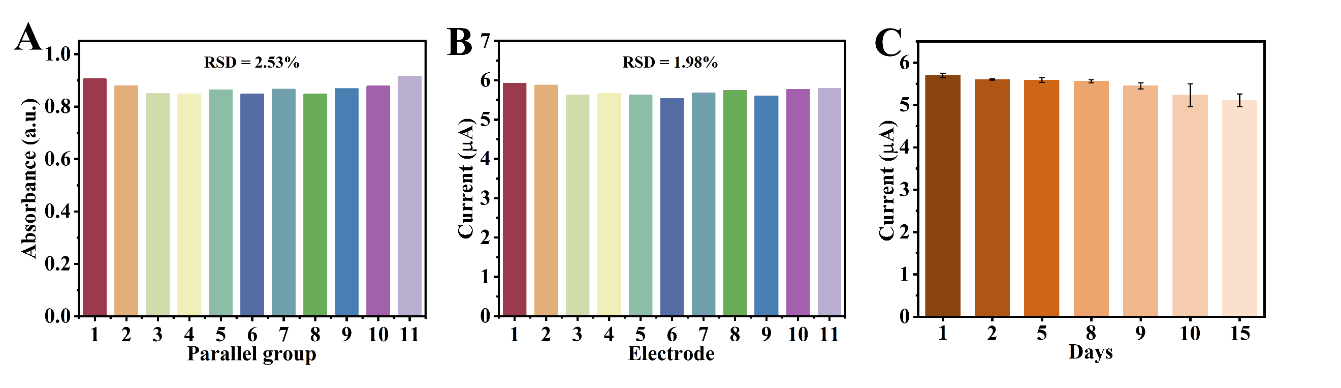
Figure S7.** (A) reproducibility of the colorimetric biosensor. (B) reproducibility and (C) stability of the electrochemical biosensor.

**Table S2** Comparison of the proposed sensor with other UO22+ detection methods.

| **Signal probe** | **Method** | **LOD**  **(M)** | **Linear range (****M)** | **Reference** |
| --- | --- | --- | --- | --- |
| Eu3+@TFPB-Bpy | Fluorimetry | 1.36×10-9 | 5.00×10-9-5.00×10-6 | [7] |
| PyTT-Tp | Fluorimetry | 4.92×10-9 | 1.50×10-8-4.50×10-6 | [8] |
| PDA-rGO | Electrochemistry | 5.00×10-8 | 1.00×10-7-5.00×10-5 | [9] |
| FePt/ZnIn2S4 | Electrochemistry | 7.17×10-8 | 5.00×10-7-1.00×10-5 | [10] |
| ZIF-L-hemin | Colorimetry | 7.90×10-8 | 2.50×10-7-4.00×10-5 | [11] |
| Tph-BT | Colorimetry (OXD) | 2.00×10-8 | 7.50×10-8-6.00×10-5 | [1] |
| Colorimetry (POD) | 1.00×10-7 | 3.75×10-7-1.50×10-4 |
| AuNCs@COF | Colorimetry | 1.07×10-10 | 1.36×10-10-1.36×10-5 | This work |
| Electrochemistry | 3.47×10-10 | 5.00×10-10-2.50×10-5 |

**References**

[1] L Zhang, Q G Tan, S J Xiao, G P Yang, X Liu, Q Q Zheng, J Q Fan, R P Liang, J D Qiu. DNAzyme-Derived Aptamer Reversely Regulates the Two Types of Enzymatic Activities of Covalent-Organic Frameworks for the Colorimetric Analysis of Uranium [J]. Anal Chem, 2023, 95(10): 4703-11.

[2] Y Y Song, J Qiao, W Liu, L Qi. Norfloxacin detection based on the peroxidase-like activity enhancement of gold nanoclusters [J]. Anal Bioanal Chem, 2021, 413(4): 979-85.

[3] B Fu, T L Liu, J C Chen, K Li. CaF2 nanoparticles as peroxidase mimics for rapid and sensitive detection of aldosterone [J]. Anal Chim Acta, 2019, 1078: 119-24.

[4] W Q Xu, L Jiao, H Y Yan, Y Wu, L J Chen, W L Gu, D Du, Y H Lin, C Z Zhu. Glucose Oxidase-Integrated Metal-Organic Framework Hybrids as Biomimetic Cascade Nanozymes for Ultrasensitive Glucose Biosensing [J]. Acs Appl Mater Inter, 2019, 11(25): 22096-101.

[5] C Zhong, C Hu, D Ouyang, A K Dan, Y H Zhong, Z W Cai, Z Lin. Bioinspired construction of histidine-doped porphyrin covalent organic framework nanozyme with enhanced peroxidase-like activity for sensitive uric acid detection [J]. Chem Eng J, 2023, 477: 146979.

[6] Y Zhou, Y Wei, J S Ren, X G Qu. A chiral covalent organic framework (COF) nanozyme with ultrahigh enzymatic activity [J]. Mater Horiz, 2020, 7(12): 3291-7.

[7] X L Mao, Y J Cai, Q X Luo, X Liu, Q Q Jiang, C R Zhang, L Zhang, R P Liang, J D Qiu. Europium(III) Functionalized Covalent Organic Framework as Sensitive and Selective Fluorescent Switch for Detection of Uranium [J]. Anal Chem, 2024, 96(12): 5037-45.

[8] W R Cui, W Xu, W B Qiu. Constructing an ultrastable imidazole covalent organic framework for concurrent uranium detection and recovery [J]. Ecotox Environ Safe, 2023, 252: 114639.

[9] W H Guo, H L Xu, C Chen, X H Cao, J G Ma, Y H Liu. Determination of U(VI) by differential pulse stripping voltammetry using a polydopamine/reduced graphene oxide nanocomposite modified glassy carbon electrode [J]. Microchem J, 2022, 175: 107111.

[10] H Zeynali, M Motaghedifard, B F O Costa, H Akbari, Z Moghadam, M Babaeianfar, M J Rashidi. Design and development a novel uranyl sensor based on FePt/ZnIn2S4 core-shell semiconductor nanostructures [J]. Arab J Chem, 2020, 13(1): 1429-39.

[11] Z X Zhou, W T He, H Chao, H Wang, P Su, J Y Song, Y Yang. Insertion of Hemin into Metal-Organic Frameworks: Mimicking Natural Peroxidase Microenvironment for the Rapid Ultrasensitive Detection of Uranium [J]. Anal Chem, 2022, 94(18): 6833-41.
